# Supplementary material for: Maternal Under- and Over-Nutrition during Gestation Causes Islet Hypertrophy and Sex-Specific Changes to Pancreas DNA Methylation in Fetal Sheep
Source: MDPI journal article supplement (doi:10.3390/ani11092531), 2021-08-28
Supplement: s1 [file s1]

**Table S3:** DMR CON vs. OVER Females

| Position              | length | nCG | CON Mean<br>Methyl | OVER Mean<br>Methyl | Description                                                                                                       |
|-----------------------|--------|-----|--------------------|---------------------|-------------------------------------------------------------------------------------------------------------------|
| 12:47934573-47934638  | 66     | 9   | 0.26               | 0.57                | 2.108 KB away from ENSOARG00000005173                                                                             |
| 17:70880056-70880129  | 74     | 6   | 0.77               | 0.47                | 1.660 kb away from <i>SPECCIL</i> gene                                                                            |
| 18:63069833-63069885  | 53     | 4   | 0.10               | 0.70                | 3.987 kb away from <i>SETD3</i>                                                                                   |
| 24:35371763-35371855  | 93     | 4   | 0.92               | 0.12                | 69 bp away from <i>CLDN15</i>                                                                                     |
| 2:241992534-241992653 | 120    | 4   | 0.05               | 0.89                | <i>HMGCL</i> ; intron 5 of 8                                                                                      |
| 2:241724810-241724896 | 87     | 4   | 0.08               | 0.90                | <i>MYOM3</i> ; Exon 21 OF 37                                                                                      |
| 16:70640052-70640167  | 116    | 9   | 0.13               | 0.95                | Intron of ENSOART00000029045 and<br>ENSOART00000017123                                                            |
| 9:93331263-93331326   | 64     | 7   | 0.04               | 0.78                | <i>CHMP4C</i> ; Intron                                                                                            |
| 11:47328059-47328159  | 101    | 13  | 0.09               | 0.83                | ENSOART00000014446, 5', IN EXON                                                                                   |
| 2:51540059-51540115   | 57     | 6   | 0.19               | 0.89                | <i>PAX5</i> ; Intron 9 of 9                                                                                       |
| 14:53536170-53536285  | 116    | 6   | 0.19               | 0.89                | <i>NAPA</i> ; Intron 1 of 10                                                                                      |
| 3:2108909-2108970     | 62     | 8   | 0.09               | 0.75                | ENSOART00000027916, ENSOART00000027915,<br>ENSOART00000002464; Intron between exons                               |
| 3:132428853-132428913 | 61     | 5   | 0.07               | 0.73                | <i>HOXC13</i> ; Exon 2 of 3                                                                                       |
| 12:69836775-69836834  | 60     | 7   | 0.27               | 0.80                | <i>LPGAT1</i> ; Intron 5 and 7 of 8                                                                               |
| 3:13929171-13929238   | 68     | 9   | 0.11               | 0.57                | <i>TTILL11</i> ; Intron 9 of 9                                                                                    |
| 18:55012746-55012806  | 61     | 7   | 0.42               | 0.85                | <i>CCDC88C</i> ; Intron 22 of 30                                                                                  |
| 10:34657676-34657785  | 110    | 6   | 0.19               | 0.60                | <i>TNFRSF19</i> ; Intron 3 of 8                                                                                   |
| 7:98651520-98651596   | 77     | 17  | 0.29               | 0.68                | ENSOART00000028764; Intron between exons<br>ENSOART00000000978; Intron 1 of 1 and<br>ENSOART00000028517; Intron 1 |
| 9:14267289-14267341   | 53     | 9   | 0.42               | 0.66                | ENSOART00000010113                                                                                                |
| 21:49900756-49900825  | 70     | 6   | 0.50               | 0.62                | ENSOART00000004682; Exon 2 of 6                                                                                   |
| 5:36481130-36481193   | 64     | 9   | 0.41               | 0.48                | ENSOARG00000026493; Exon 3 of 3                                                                                   |
| 9:13139916-13139987   | 72     | 6   | 0.63               | 0.33                | <i>KMT2C</i> ; Exon 46 of 66                                                                                      |
| 4:114008909-114008998 | 90     | 5   | 0.94               | 0.39                | <i>MYH11</i> ; Intron 1 of 39                                                                                     |
| 24:14198052-14198116  | 65     | 4   | 0.63               | 0.06                | ENSOART00000009068; Intron 6 of 7                                                                                 |
| 20:17379447-17379517  | 71     | 8   | 0.75               | 0.16                |                                                                                                                   |

|                       |     |    |      |      |                                         |
|-----------------------|-----|----|------|------|-----------------------------------------|
| 24:38707723-38707788  | 66  | 8  | 0.85 | 0.06 | ENSOARG00000025897 Intron between exons |
| 5:13991975-13992030   | 56  | 4  | 0.92 | 0.06 | ENSOART0000000590                       |
| 1:261702406-261702518 | 113 | 8  | 0.09 | 0.89 | Intron                                  |
| 14:49468505-49468597  | 93  | 5  | 0.10 | 0.87 | Intron                                  |
| 4:8704730-8704798     | 69  | 7  | 0.16 | 0.88 | Intron                                  |
| 23:58126139-58126200  | 62  | 4  | 0.10 | 0.79 | Intron                                  |
| 14:57707275-57707373  | 99  | 6  | 0.08 | 0.75 | Intron                                  |
| 1:2342450-2342507     | 58  | 5  | 0.22 | 0.88 | Intron                                  |
| 2:247942155-247942223 | 69  | 8  | 0.27 | 0.91 | Intron                                  |
| X:125632027-125632092 | 66  | 6  | 0.08 | 0.62 | Intron                                  |
| X:48437124-48437210   | 87  | 9  | 0.10 | 0.62 | Intron                                  |
| 20:14551322-14551374  | 53  | 11 | 0.33 | 0.83 | Intron                                  |
| 19:56304838-56304889  | 52  | 11 | 0.05 | 0.53 | Intron                                  |
| 19:7083095-7083149    | 55  | 11 | 0.12 | 0.52 | Intron                                  |
| 21:41772133-41772198  | 66  | 4  | 0.29 | 0.65 | Intron                                  |
| 11:33238193-33238294  | 102 | 9  | 0.74 | 0.26 | Intron                                  |
| 24:11489681-11489735  | 55  | 7  | 0.76 | 0.23 | Intron                                  |
| 26:1272854-1272914    | 61  | 15 | 0.78 | 0.21 | Intron                                  |
| 22:48534864-48534936  | 73  | 6  | 0.93 | 0.34 | Intron                                  |
| 4:118424199-118424317 | 119 | 6  | 0.89 | 0.20 | Intron                                  |
| 20:50005171-50005240  | 70  | 9  | 0.89 | 0.07 | Intron                                  |
| 5:59075782-59075888   | 107 | 5  | 0.91 | 0.05 | Intron                                  |
| 11:61046301-61046361  | 61  | 8  | 0.94 | 0.06 | Intron                                  |

---

Position<sup>1</sup>: Defines the chromosome and specific loci where the DMR is located; Length<sup>2</sup>: The length in base pairs of the DMR; nCG<sup>3</sup>: number of CpG dinucleotides within the region of interest; CON and OVER mean methyl<sup>4</sup>: the numerical representation of DNA methylation at the CpG dinucleotides in this region for a given treatment group. Determined by DSS with 0 being the minimum and 1 being the maximum.
