# Supplementary material for: Maternal Under- and Over-Nutrition during Gestation Causes Islet Hypertrophy and Sex-Specific Changes to Pancreas DNA Methylation in Fetal Sheep
Source: MDPI journal article supplement (doi:10.3390/ani11092531), 2021-08-28
Supplement: s1 [file s1]

**Table S2.** DMR CON vs. RES Males

| Position              | length | nCG | CON Mean Methyl | RES Mean Methyl | Description                                      |
|-----------------------|--------|-----|-----------------|-----------------|--------------------------------------------------|
| 3:202159208-202159267 | 60     | 6   | 0.07            | 0.85            | 3.065 KB away from <i>DUSP16</i>                 |
| 5:58665088-58665159   | 72     | 5   | 0.38            | 0.89            | 4.905 kb away from <i>PPARGC1B</i>               |
| 11:54422768-54422855  | 88     | 7   | 0.06            | 0.78            | 1.296 KB away from <i>QRICH2</i>                 |
| 15:78117923-78118004  | 82     | 4   | 0.07            | 0.89            | 583 bp away from <i>ZDHHC5</i>                   |
| 1:93136505-93136556   | 52     | 4   | 0.27            | 0.91            | <i>IGSF3</i> ; Exon 2 of 3                       |
| 1:262873778-262873831 | 54     | 5   | 0.08            | 0.53            | <i>ITGB2</i> ; Exon 10 of 17                     |
| 2:189246693-189246840 | 148    | 4   | 0.09            | 0.92            | <i>CNTNAP5</i> ; intron 12 of 22                 |
| 2:132848318-132848374 | 57     | 7   | 0.17            | 0.87            | <i>HOXD3</i> ; Intron 1 of 3                     |
| 2:239803845-239803908 | 64     | 7   | 0.04            | 0.60            | <i>CNKSR1</i> ; Intron 1 of 21                   |
| 2:110899932-110899989 | 58     | 23  | 0.16            | 0.58            | <i>PALLD</i> ; Intron 11 of 22                   |
| 3:161641254-161641314 | 61     | 10  | 0.08            | 0.91            | <i>AGAP2</i> ; exon 22 and exon 18               |
| 5:49331321-49331393   | 73     | 4   | 0.15            | 0.69            | <i>PCDHA5</i> ; INTRON                           |
| 6:113430863-113430929 | 67     | 6   | 0.33            | 0.92            | <i>SORCS2</i> ; Exon 1 of 14                     |
| 8:73546567-73546618   | 52     | 5   | 0.08            | 0.76            | <i>7C3H12D</i> ; Intron 3 of 5                   |
| 9:13718226-13718282   | 57     | 9   | 0.78            | 0.15            | <i>OPLAH</i> ; Intron 4 of 24                    |
| 12:73332410-73332460  | 51     | 5   | 0.38            | 0.89            | <i>PLXNA2</i> ; INTRON                           |
| 13:37691865-37691947  | 83     | 5   | 0.90            | 0.07            | <i>SEC23B</i> ; Exon 5 of 20                     |
| 14:13211805-13211903  | 99     | 8   | 0.84            | 0.05            | <i>ZNF469</i> ; Exon 11 of 11                    |
| 16:63840143-63840242  | 100    | 9   | 0.08            | 0.91            | <i>SEMA5A</i> ; Exon 5 of 24                     |
| 17:63069786-63069849  | 64     | 5   | 0.06            | 0.71            | <i>TRPL4</i> ; EXON/INTRON                       |
| 18:63666165-63666245  | 81     | 6   | 0.10            | 0.93            | <i>EVL</i> ; intron 1 of 15                      |
| 19:50037484-50037584  | 101    | 10  | 0.05            | 0.85            | <i>SEMA3B</i> ; Exon 19 of 19                    |
| 19:48041293-48041384  | 92     | 7   | 0.08            | 0.87            | <i>ITIH4</i> ; Exon 4 of 23                      |
| 19:57887666-57887722  | 57     | 4   | 0.09            | 0.81            | <i>XPC</i> ; Exon 4 of 21                        |
| 19:7525598-7525651    | 54     | 5   | 0.37            | 0.88            | <i>FBXL2</i> ; Intron 3 of 17                    |
| 20:50389049-50389109  | 61     | 6   | 0.21            | 0.92            | <i>GMDS</i> ; Intron 17 of 8                     |
| 22:40964876-40964966  | 91     | 8   | 0.08            | 0.90            | <i>TACC2</i> INTRON 7/11 AND 6/21                |
| 24:38193510-38193603  | 94     | 9   | 0.88            | 0.07            | <i>DAGLB</i> ; INTRON 2 of 13 AND ENSOART INTRON |
| 26:35359136-35359190  | 55     | 6   | 0.09            | 0.68            | <i>KAT6A</i> ; Intron 7 of 18                    |
| 1:112851565-112851620 | 56     | 4   | 0.15            | 0.86            | Intron                                           |
| 3:77936730-77936793   | 64     | 4   | 0.08            | 0.90            | Intron                                           |
| 3:1301392-1301454     | 63     | 7   | 0.11            | 0.89            | Intron                                           |
| 4:5110018-5110069     | 52     | 4   | 0.05            | 0.86            | Intron                                           |
| 6:114796343-114796395 | 53     | 4   | 0.07            | 0.90            | Intron                                           |
| 8:87098382-87098435   | 54     | 5   | 0.21            | 0.83            | Intron                                           |
| 9:16404705-16404788   | 84     | 5   | 0.08            | 0.92            | Intron                                           |
| 9:27465758-27465846   | 89     | 7   | 0.05            | 0.87            | Intron                                           |

|                      |     |   |      |      |        |
|----------------------|-----|---|------|------|--------|
| 10:83894191-83894264 | 74  | 6 | 0.07 | 0.89 | Intron |
| 10:85913053-85913133 | 81  | 9 | 0.08 | 0.82 | Intron |
| 10:31189762-31189825 | 64  | 6 | 0.09 | 0.76 | Intron |
| 14:13721605-13721704 | 100 | 4 | 0.08 | 0.91 | Intron |
| 14:58805301-58805353 | 53  | 4 | 0.04 | 0.66 | Intron |
| 15:25770093-25770168 | 76  | 7 | 0.07 | 0.87 | Intron |
| 16:69499064-69499121 | 58  | 4 | 0.05 | 0.89 | Intron |
| 18:26740266-26740322 | 57  | 4 | 0.06 | 0.70 | Intron |
| 20:19475895-19475947 | 53  | 4 | 0.05 | 0.68 | Intron |
| 20:49611584-49611635 | 52  | 5 | 0.19 | 0.77 | Intron |
| 20:10592049-10592100 | 52  | 7 | 0.07 | 0.52 | Intron |
| 20:43916067-43916121 | 55  | 6 | 0.82 | 0.07 | Intron |
| 20:16182376-16182444 | 69  | 4 | 0.92 | 0.17 | Intron |
| 23:46399514-46399590 | 77  | 5 | 0.08 | 0.91 | Intron |
| 26:5357940-5357993   | 54  | 4 | 0.07 | 0.91 | Intron |
| 26:1135785-1135837   | 53  | 5 | 0.24 | 0.93 | Intron |

Position<sup>1</sup>: Defines the chromosome and specific loci where the DMR is located ; Length<sup>2</sup>: The length in base pairs of the DMR; nCG<sup>3</sup>: number of CpG dinucleotides within the region of interest; CON and RES mean methyl<sup>4</sup>: the numerical representation of DNA methylation at the CpG dinucleotides in this region for a given treatment group. Determined by DSS with 0 being the minimum and 1 being the maximum.
