# Supplementary material for: Maternal Under- and Over-Nutrition during Gestation Causes Islet Hypertrophy and Sex-Specific Changes to Pancreas DNA Methylation in Fetal Sheep
Source: MDPI journal article supplement (doi:10.3390/ani11092531), 2021-08-28
Supplement: s1 [file s1]

**Table S4:** DMR CON vs. OVER males

| Position              | length | nCG | CON Mean<br>Methyl | OVER Mean<br>Methyl | Description                                                         |
|-----------------------|--------|-----|--------------------|---------------------|---------------------------------------------------------------------|
| 14:49606092-49606178  | 87     | 5   | 0.041680835        | 0.895398813         | <i>B3GNT8</i> : Exon 1 of 3                                         |
| 11:54652590-54652670  | 81     | 8   | 0.102872291        | 0.829746134         | <i>EVPL</i> : Exon 23 of 25; ENSOART00000009201: Exon 7 of 7        |
| 24:1371700-1371798    | 99     | 13  | 0.194786155        | 0.855225276         | <i>HAGH</i> : Intron 7 of 9                                         |
| 13:53103530-53103618  | 89     | 4   | 0.265741601        | 0.906829            | <i>OPRL1</i> : Exon 3 of 3                                          |
| 20:15672573-15672649  | 77     | 4   | 0.266862843        | 0.901706398         | <i>FRS3</i> : Exon 6 of 6                                           |
| 19:7525598-7525651    | 54     | 5   | 0.370443544        | 0.925768552         | <i>FBXL2</i> : Intron 3 of 17                                       |
| 1:10843416-10843497   | 82     | 9   | 0.330168738        | 0.825513102         | <i>MAP7D1</i> : Exon 10 of 17                                       |
| 6:113784956-113785018 | 63     | 5   | 0.804237098        | 0.228820095         | <i>ABLIM2</i> : Intron 7 of 22; ENSOART00000012888: Intron 11 of 12 |
| 1:127157-127218       | 62     | 4   | 0.769333287        | 0.066692206         |                                                                     |
| 22:48153604-48153665  | 62     | 6   | 0.042131761        | 0.893367642         | ENSOART00000016253: INTRON 3 of 10                                  |
| 17:72098904-72098961  | 58     | 4   | 0.05009988         | 0.877824349         | ENSOART00000019397: Intron 1 of 2                                   |
| 11:24630235-24630314  | 80     | 4   | 0.141605495        | 0.891078618         | ENSOART00000020789: Intron 8 of 11                                  |
| 17:71050663-71050722  | 60     | 7   | 0.077644127        | 0.768991574         | ENSOART00000015848: Intron 1 of 21                                  |
| 11:8020039-8020100    | 62     | 9   | 0.414990377        | 0.916130779         | ENSOART00000008542: Intron 9 of 10                                  |
| 3:1520643-1520717     | 75     | 4   | 0.473276777        | 0.665105887         | Lincrna ensoart00000027906                                          |
| 2:246671910-246671979 | 70     | 4   | 0.674297834        | 0.264657039         | LINC RNA ENSOARG00000027830; 2 SNPS                                 |
| 6:44244206-44244271   | 66     | 6   | 0.830603671        | 0.207785274         | 1 SNP                                                               |
| 22:48153604-48153665  | 62     | 6   | 0.042131761        | 0.893367642         | ENSOART00000016253: Intron 3 of 10                                  |
| 17:72098904-72098961  | 58     | 4   | 0.05009988         | 0.877824349         | ENSOART00000019397: Intron 1 of 2                                   |
| 11:24630235-24630314  | 80     | 4   | 0.141605495        | 0.891078618         | ENSOART00000020789: Intron 8 of 11                                  |
| 17:71050663-71050722  | 60     | 7   | 0.077644127        | 0.768991574         | ENSOART00000015848: Intron 1 of 21                                  |
| 11:8020039-8020100    | 62     | 9   | 0.414990377        | 0.916130779         | ENSOART00000008542: Intron 9 of 10                                  |
| 3:1520643-1520717     | 75     | 4   | 0.473276777        | 0.665105887         | 5 SNPS; Lincrna ensoart00000027906                                  |
| 2:246671910-246671979 | 70     | 4   | 0.674297834        | 0.264657039         | LINC RNA ENSOARG00000027830; 2 SNPS                                 |
| 6:44244206-44244271   | 66     | 6   | 0.830603671        | 0.207785274         | 1 SNP                                                               |
| 16:5003410-5003463    | 54     | 6   | 0.087075185        | 0.833660409         | Intron                                                              |
| 15:25817118-25817174  | 57     | 5   | 0.069898905        | 0.895398813         | Intron                                                              |

|                       |    |   |             |             |        |
|-----------------------|----|---|-------------|-------------|--------|
| 13:78193221-78193303  | 83 | 5 | 0.07776261  | 0.79259617  | Intron |
| 12:77589529-77589592  | 64 | 6 | 0.126463782 | 0.742004317 | Intron |
| 24:38102767-38102836  | 70 | 5 | 0.875303149 | 0.188286781 | Intron |
| 16:70927301-70927351  | 51 | 5 | 0.376954719 | 0.953466008 | Intron |
| 3:210701775-210701837 | 63 | 6 | 0.329697687 | 0.762501829 | Intron |
| 11:36250281-36250361  | 81 | 4 | 0.260779749 | 0.680534441 | Intron |

---

Position<sup>1</sup>: Defines the chromosome and specific loci where the DMR is located; Length<sup>2</sup>: The length in base pairs of the DMR; nCG<sup>3</sup>: number of CpG dinucleotides within the region of interest; CON and OVER mean methyl<sup>4</sup>: the numerical representation of DNA methylation at the CpG dinucleotides in this region for a given treatment group. Determined by DSS with 0 being the minimum and 1 being the maximum.
