# Supplementary material for: Maternal Under- and Over-Nutrition during Gestation Causes Islet Hypertrophy and Sex-Specific Changes to Pancreas DNA Methylation in Fetal Sheep
Source: MDPI journal article supplement (doi:10.3390/ani11092531), 2021-08-28
Supplement: s1 [file s1]

**Table S1:** DMR CON vs. RES Females

| Position              | Length | nCG | CON<br>Mean<br>Methyl | RES<br>Mean<br>Methyl | Description                                                                    |
|-----------------------|--------|-----|-----------------------|-----------------------|--------------------------------------------------------------------------------|
| 1:464715-464771       | 57     | 5   | 0.76                  | 0.04                  | 2.4 KB away from <i>HDLBP</i> gene                                             |
| 2:239653860-239653940 | 81     | 6   | 0.91                  | 0.28                  | 1.066 KB away from <i>AIMIL</i>                                                |
| 16:68991039-68991095  | 57     | 4   | 0.06                  | 0.72                  | 2.769 KB away from ENSOART00000029041 and 2.728KB away from ENSOART00000006290 |
| 3:218500576-218500627 | 52     | 5   | 0.84                  | 0.23                  | Intron of <i>EFCAB6</i> AND SNPS                                               |
| 6:114757255-114757320 | 66     | 5   | 0.19                  | 0.74                  | Intron of ENSOART00000012888                                                   |
| 7:97968446-97968507   | 62     | 7   | 0.56                  | 0.03                  | Intron of ENSOART00000003646                                                   |
| 9:86033664-86033753   | 90     | 13  | 0.70                  | 0.28                  | Intron of <i>TMEM55A</i>                                                       |
| 9:93437818-93437878   | 61     | 11  | 0.89                  | 0.34                  | Intron of <i>SLC10A5</i>                                                       |
| 11:61882803-61882874  | 72     | 5   | 0.16                  | 0.72                  | Intron of <i>CACNG5</i>                                                        |
| 11:61883532-61883591  | 60     | 9   | 0.17                  | 0.62                  | Exon of <i>CACNG5</i>                                                          |
| 15:80037597-80037659  | 63     | 10  | 0.22                  | 0.83                  | <i>TCN1</i> and LincRNA and ENSART00000028887                                  |
| 15:54729901-54729957  | 57     | 4   | 0.92                  | 0.05                  | Intron of <i>MYO7A</i>                                                         |
| 16:71007561-71007626  | 66     | 4   | 0.89                  | 0.08                  | Intron of ENSOART00000029051 and ENSOART00000017567 and 17558                  |
| 19:12309493-12309543  | 51     | 5   | 0.32                  | 0.74                  | Intron of <i>WDR48</i>                                                         |
| 19:59382698-59384364  | 1667   | 8   | 0.65                  | 0.28                  | Intron of <i>KBTBD12</i>                                                       |
| 20:46494357-46494436  | 80     | 7   | 0.77                  | 0.34                  | Intron of ENSOART00000018791                                                   |
| 24:517119-517175      | 57     | 5   | 0.71                  | 0.25                  | Exons of ENSOART00000014492 and ENSOART00000014379                             |
| 24:10372469-10372551  | 83     | 7   | 0.87                  | 0.05                  | Exon of <i>TXNDC11</i>                                                         |
| X:16844758-16844835   | 78     | 13  | 0.10                  | 0.67                  | Exon of <i>MAP3K15</i>                                                         |
| 1:1650602-1650669     | 68     | 11  | 0.84                  | 0.25                  | Intron                                                                         |
| 4:118512424-118512488 | 65     | 7   | 0.82                  | 0.39                  | Intron                                                                         |
| 5:37271183-37271264   | 82     | 9   | 0.08                  | 0.53                  | Intron                                                                         |
| 10:10836737-10836818  | 82     | 13  | 0.26                  | 0.79                  | Intron                                                                         |
| 11:52284621-52284678  | 58     | 4   | 0.91                  | 0.27                  | Intron                                                                         |
| 14:17657754-17657829  | 76     | 5   | 0.92                  | 0.09                  | Intron                                                                         |

|                      |    |    |      |      |        |
|----------------------|----|----|------|------|--------|
| 20:14551751-14551812 | 62 | 7  | 0.20 | 0.58 | Intron |
| 20:50995235-50995299 | 65 | 6  | 0.95 | 0.12 | Intron |
| 20:49813946-49814021 | 76 | 17 | 0.38 | 0.90 | Intron |
| 23:59841258-59841324 | 67 | 5  | 0.93 | 0.07 | Intron |
| 25:39228278-39228365 | 88 | 4  | 0.04 | 0.89 | Intron |

Position<sup>1</sup>: Defines the chromosome and specific loci where the DMR is located; Length<sup>2</sup>: The length in base pairs of the DMR; nCG<sup>3</sup>: number of CpG dinucleotides within the region of interest; CON and RES mean methyl<sup>4</sup>: the numerical representation of DNA methylation at the CpG dinucleotides in this region for a given treatment group. Determined by DSS with 0 being the minimum and 1 being the maximum.
